# Supplementary material
Source: PubMed Central journal article supplement (PMC2903415)

Fig. S1

**A**

| Protein/peptide | prophet probability | Sequence                | Charge | Xcorr | dCn   | Ions matched |
|-----------------|---------------------|-------------------------|--------|-------|-------|--------------|
|                 | 1                   | K.LLSEEVDFDFSSGQITQVK.S | 2      | 5.166 | 0.6   | 70% (34)     |
|                 | 1                   | K.EFAGEDTSDLFLEER.E     | 2      | 4.046 | 0.512 | 64% (28)     |
|                 | 0.8833              | K.IYLDMLNVYK.C          | 2      | 2.97  | 0.28  | 77% (18)     |
|                 | 0.8718              | K.AVGHPFVIQLGR.I        | 3      | 3.38  | 0.382 | 56% (44)     |
|                 | 0.8622              | K.YYGLQILENVK.T         | 2      | 2.977 | 0.39  | 77% (22)     |
|                 | 0.8622              | K.DFEEYPEHR.E           | 2      | 2.154 | 0.347 | 75% (16)     |

**B**

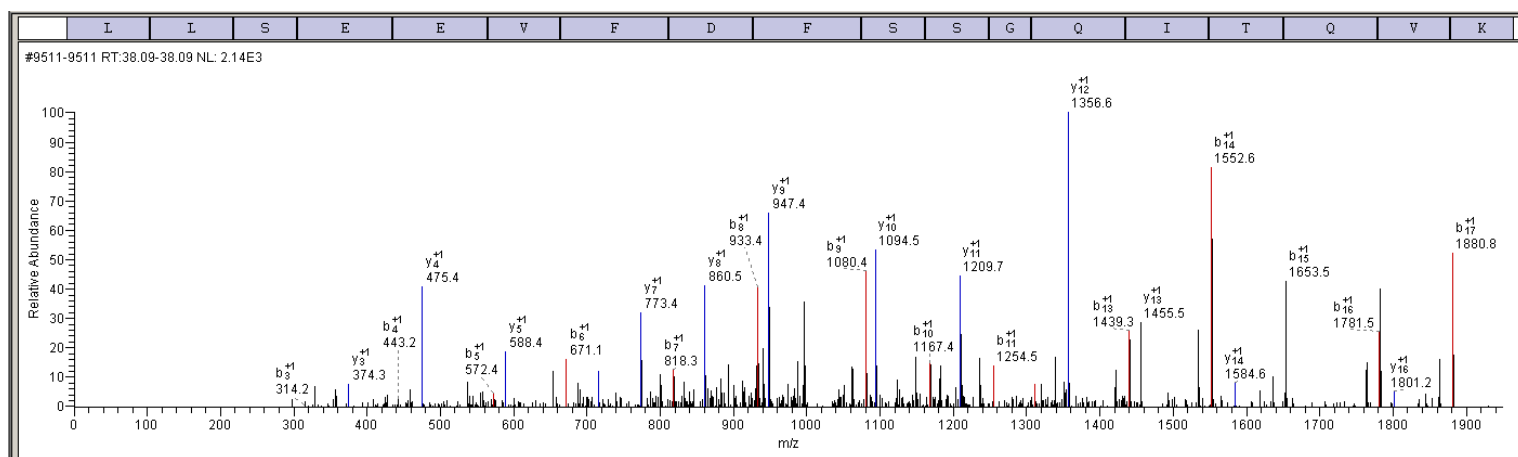

**C**

|    | AA | B       | Y       |    |
|----|----|---------|---------|----|
| 1  | L  | 114.09  | -       | 18 |
| 2  | L  | 227.18  | 1913.95 | 17 |
| 3  | S  | 314.21  | 1800.87 | 16 |
| 4  | E  | 443.25  | 1713.83 | 15 |
| 5  | E  | 572.29  | 1584.79 | 14 |
| 6  | V  | 671.36  | 1455.75 | 13 |
| 7  | F  | 818.43  | 1356.68 | 12 |
| 8  | D  | 933.46  | 1209.61 | 11 |
| 9  | F  | 1080.52 | 1094.58 | 10 |
| 10 | S  | 1167.56 | 947.52  | 9  |
| 11 | S  | 1254.59 | 860.48  | 8  |
| 12 | G  | 1311.61 | 773.45  | 7  |
| 13 | Q  | 1439.67 | 716.43  | 6  |
| 14 | I  | 1552.75 | 588.37  | 5  |
| 15 | T  | 1653.80 | 475.29  | 4  |
| 16 | Q  | 1781.86 | 374.24  | 3  |
| 17 | V  | 1880.93 | 246.18  | 2  |
| 18 | K  | -       | 147.11  | 1  |

Fig. S2

A

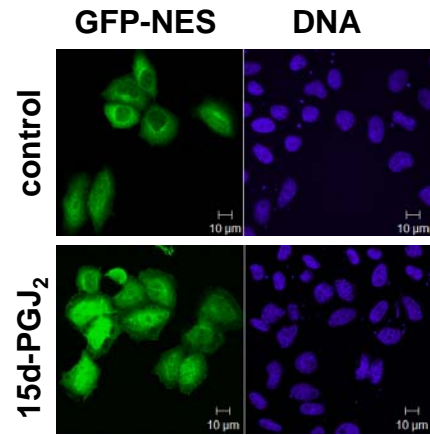

B

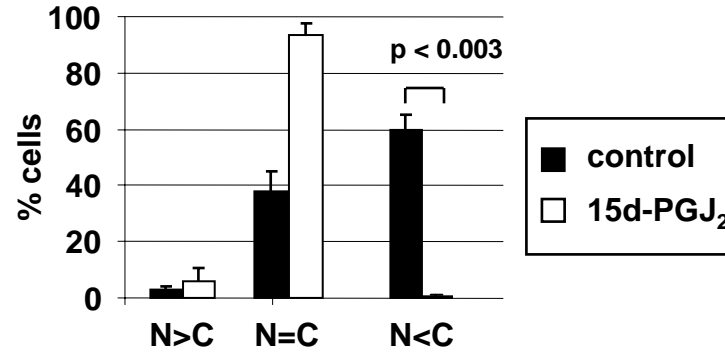

Fig. S3

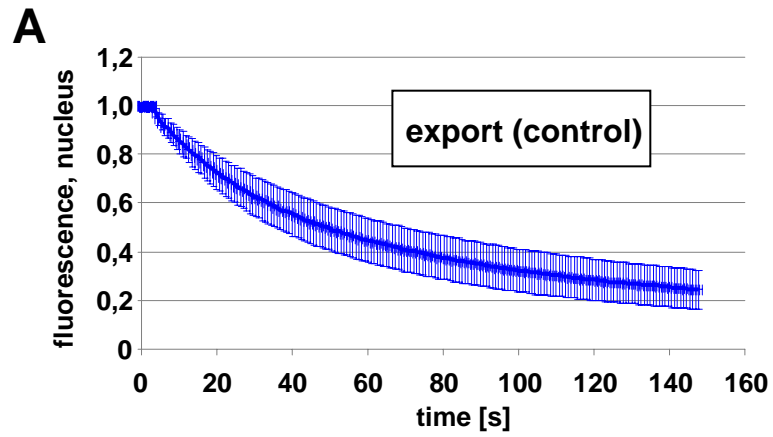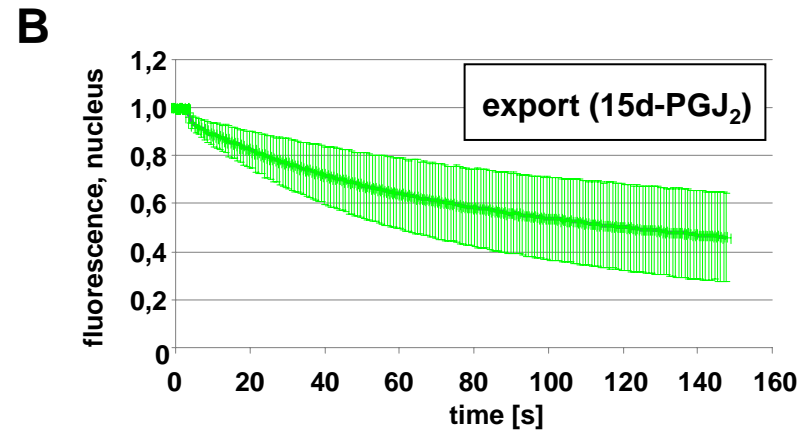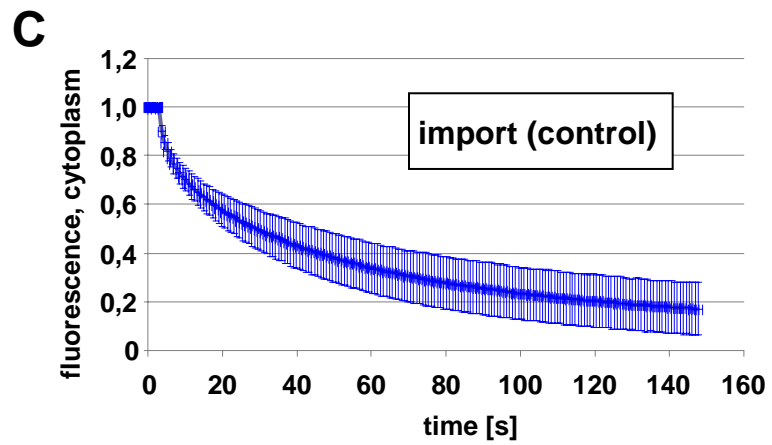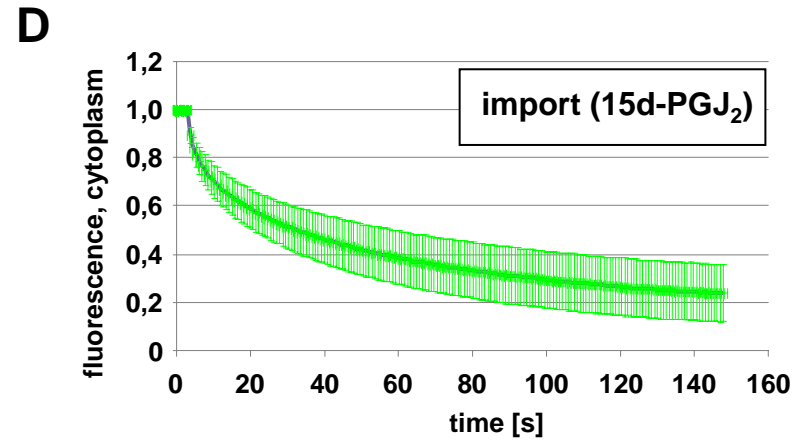

Fig. S4

**A**

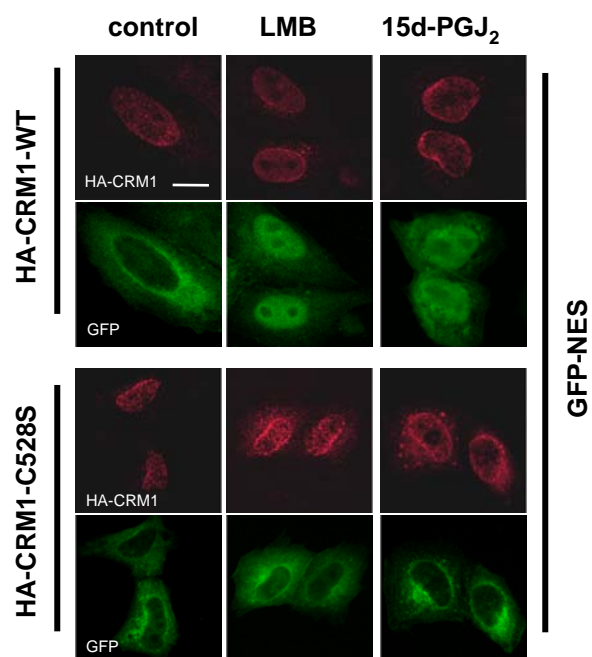

**B**

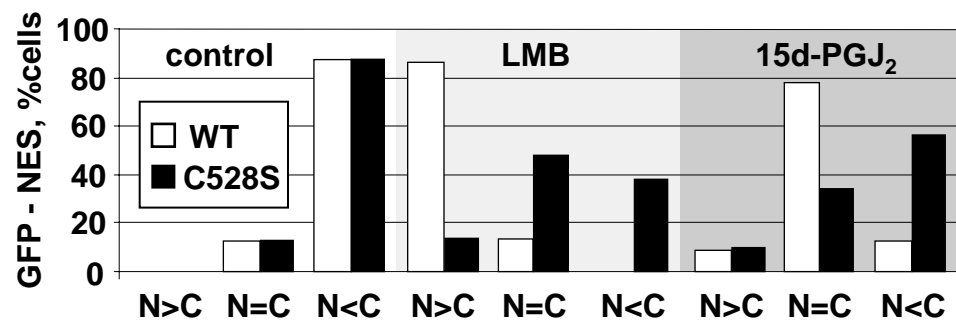

Supplement: supp_M110.131821_jbc.M110.131821-1.pdf [file supp_M110.131821_jbc.M110.131821-1.pdf]
